# Supplementary material for: Porphyrin-based metal–organic framework catalysts for photoreduction of CO2: understanding the effect of node connectivity and linker metalation on activity
Source: Royal Society of Chemistry journal article supplement (doi:10.1039/d0nj03507f), 2020-01-01
Supplement: d0nj03507f1.pdf [file d0nj03507f1.pdf]

## Supporting Information

**Table S1.** The ICP spectrometer analysis of metal element

| Sample     | Element/ Zinc (Zn)<br>Content /wt% | Element /Zirconium (Zr)<br>Content /wt% |
|------------|------------------------------------|-----------------------------------------|
| PCN-222-Zn | 32.22                              | 4.73                                    |
| PCN-223-Zn | 38.67                              | 10.29                                   |
| PCN-224-Zn | 41.05                              | 19.77                                   |

**Figure S1.** HCOOH evolution amount vs illumination time on PCN-222-Zn, PCN-223-Zn, PCN-224-Zn.

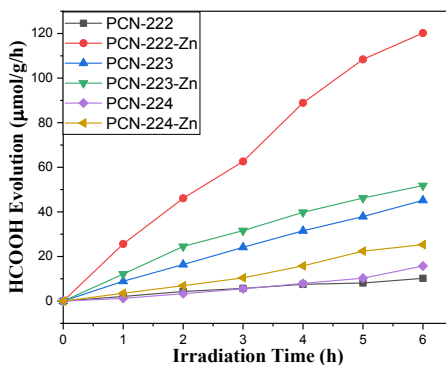

**Table S2.** The comparison of reported various photocatalytic systems for photoreduction of CO<sub>2</sub> with our work

| Catalyst   | Co-catalyst/sacrificial agent       | Light source                                                    | Major products<br>Rate µmol/g/h      | Ref                                                       |
|------------|-------------------------------------|-----------------------------------------------------------------|--------------------------------------|-----------------------------------------------------------|
| PCN-222    | -/<br>(MeCN/TEOA)=10<br>:1          | Visible<br>light<br>300W Xe<br>lamp with<br>a cut-off<br>filter | COO <sup>-</sup><br>75               | <i>J. Am. Chem. Soc.</i> , <b>2015</b> ,<br>137,13440     |
| MOF-525-Co | -/(MeCN/TEOA)=<br>4:1, 2mg catalyst | Visible<br>light<br>300W Xe<br>lamp with<br>a cut-off<br>filter | CO/ 201.6<br>CH <sub>4</sub> / 36.67 | <i>Angew. Chem. Int. Ed.</i> , <b>2016</b> ,<br>55, 14310 |

|                                                         |                                          |                                                                 |                                    |                                                              |
|---------------------------------------------------------|------------------------------------------|-----------------------------------------------------------------|------------------------------------|--------------------------------------------------------------|
| MOF-525                                                 | -(MeCN/TEOA)=<br>4:1, 2mg catalyst       | Visible<br>light<br>300W Xe<br>lamp with<br>a cut-off<br>filter | CO/ 64.02<br>CH <sub>4</sub> / 6.2 | <i>Angew. Chem.<br/>Int. Ed</i> , <b>2016</b> ,<br>55, 14310 |
| UiO-66/C <sub>3</sub> N <sub>4</sub>                    | -/H <sub>2</sub> O                       | Visible<br>light<br>300W Xe<br>lamp with<br>a cut-off<br>filter | CO/ 9.79                           | <i>Adv.Funct.<br/>Mater</i> , <b>2015</b> ,<br>51,3364       |
| UiO-66(Zr/Zn)-<br>NH <sub>2</sub>                       | -(MeCN/TEOA)=<br>4:1 and 0.1M<br>BNAH    | Visible<br>light<br>300W Xe<br>lamp with<br>a cut-off<br>filter | HCOO-<br>1.052                     | <i>Chem.Commun</i><br>, <b>2015</b> , 51,<br>5735            |
| Zn/PMOF                                                 | H <sub>2</sub> O vapor, 300mg            | 300W<br>high-<br>pressure<br>Hg lamp                            | CH <sub>4</sub> /<br>8.7           | <i>J. CO<sub>2</sub> Util</i> ,<br><b>2016</b> , 16,450      |
| NNU-28                                                  | MeCN/TEOA<br>(30:1) 50mg<br>catalyst     | Visible<br>light<br>300W Xe<br>lamp                             | HCOO-/<br>52.8                     | <i>J.Mater. Chem.<br/>A</i> , <b>2016</b> , 4,<br>2657       |
| Hollow anatase<br>TiO <sub>2</sub> with<br>{101} facets | 1 wt% RuO <sub>2</sub> /H <sub>2</sub> O | UV-vis<br>light:<br>300W Xe<br>lamp                             | CH <sub>4</sub> /<br>0.0017        | <i>ACS Catal</i> ,<br><b>2012</b> ,2, 1854                   |
